# Supplementary material for: PD-1 limits differentiation and plasticity of Tc17 cells
Source: PubMed Central journal article supplement (PMC10186197; doi:10.3389/fimmu.2023.1104730), 2023-04-28
Supplement: DataSheet_1.pdf [file DataSheet_1.pdf]

## Supplementary Information:

**Table S1. List of antibodies used for FACS analysis**

| <b>Antibody</b>          | <b>Clone</b> | <b>Catalog number</b> | <b>Manufacturer</b>      |
|--------------------------|--------------|-----------------------|--------------------------|
| anti-CD8 $\alpha$        | 53-6.7       | 100706                | Biolegend                |
| anti-PD-1                | 29F.1A12     | 135210                | Biolegend                |
| anti-CD25                | PC61         | 102020                | Biolegend                |
| anti-CD44                | IM7          | 103040                | Biolegend                |
| anti-IL-6R $\alpha$      | D7715A7      | 115812                | Biolegend                |
| anti-PD-L1               | 10F.9G2      | 124308                | Biolegend                |
| anti-IL-17               | Tc11-18H10.1 | 506916                | Biolegend                |
| anti-IL-4                | 11B11        | 504104                | Biolegend                |
| anti-IL-10               | JES5-16E3    | 505026                | Biolegend                |
| anti-IL-2                | JES6-5H4     | 503808                | Biolegend                |
| anti-CD69                | H1.2F3       | 104512                | Biolegend                |
| anti-CD27                | LG.3A10      | 124226                | Biolegend                |
| anti-CD107a              | 1D4B         | 121625, 121606        | Biolegend                |
| anti-IL-23R              | 12B2B64      | 150903                | Biolegend                |
| anti-IFN $\gamma$        | XMG1.2       | 25-7311-82            | Thermo Fisher Scientific |
| anti-CD44                | IM7          | 25-0441-81            | Thermo Fisher Scientific |
| anti-CTLA-4              | UC10-4B9     | 17-1522-82            | Thermo Fisher Scientific |
| anti-IL-21               | mhalx21      | 12-7213-82            | Thermo Fisher Scientific |
| anti-Eomes               | Dan11mag     | 12-4875-80            | Thermo Fisher Scientific |
| anti-TNF $\alpha$        | MP6-XT22     | 48-7321-82            | Thermo Fisher Scientific |
| anti-Granzyme B          | GB12         | MHGB04                | Thermo Fisher Scientific |
| anti-ROR $\gamma$ t      | AFKJS-9      | 12-6988-82            | Thermo Fisher Scientific |
| anti-ICOS                | 15F9         | 12-9940-81            | ebioscience              |
| anti-BCL6                | K112-91      | 561525                | BD Biosciences           |
| anti-TCF1                | S33-966      | 566692                | BD Biosciences           |
| anti-CD45.2              | 104          | 553772                | BD Biosciences           |
| anti-pSTAT3 (Rabbit mAb) | D3A7         | 9145                  | Cell signaling           |
| donkey anti-rabbit IgG   | Poly4064     | 406414                | Biolegend                |

**Table S2: Primer pairs used in quantitative real-time PCR**

|        |                                                                                                      |
|--------|------------------------------------------------------------------------------------------------------|
| RORc   | Forward: 5'-TGC AAG ACT CAT CGA CAA GG-3'<br>Reverse : 5'-AGG GGA TTC AAC ATC AGT GC-3'              |
| BCL6   | Forward: 5'- GGG ACA TCT TGA CGG ACG TT-3'<br>Reverse: 5'- TCA CGG GGA GGT TTA AGT GC-3'             |
| GAPDH  | Forward: 5'-GTC CCG TAG ACA AAA TGG TG-3'<br>Reverse: 5'-CAA GCT TCC CAT TCT CGG -3'                 |
| TCF7   | Forward: 5'-GAC ATC AGC CAG AAG CAA G-3'<br>Reverse: 5'-GTG CTG TCT ATA TCC GCA G-3'                 |
| T-bet  | Forward: 5'-TCA GGA CTA GGC GAA GGA GA-3'<br>Reverse : 5'-TAG TGG GCA CCT TCC AAT TC-3'              |
| HIF1a  | Forward: 5'-CGG CGA AGC AAA GAG TCT G-3'<br>Reverse : 5'-ATA ACT GAT GGT GAG CCT CAT AAC-3'          |
| IRF4   | Forward: 5'-TCT TCA AGG CTT GGG CAT TG-3'<br>Reverse : 5'-CAC ATC GTA ATC TTG TCT TCC AAG TAG-3'     |
| IL-23R | Forward: 5'-TGA AAG AGA CCC TAC ATC CCT TGA-3'<br>Reverse : 5'-CAG AAA ATT GGA AGT TGG GAT ATG TT-3' |
| IL-21  | Forward: 5'-CAT CAT TGA CCT CGT GGC CC-3'<br>Reverse : 5'-ATC GTA CTT CTC CAC TTG CAA TCC C-3'       |
| IL-17a | Forward: 5'-CTC CAG AAG GCC CTC AGA CTA-3'<br>Reverse : 5'-AGC TTT CCC TCC GCA TTG ACA-3'            |

Figure S1

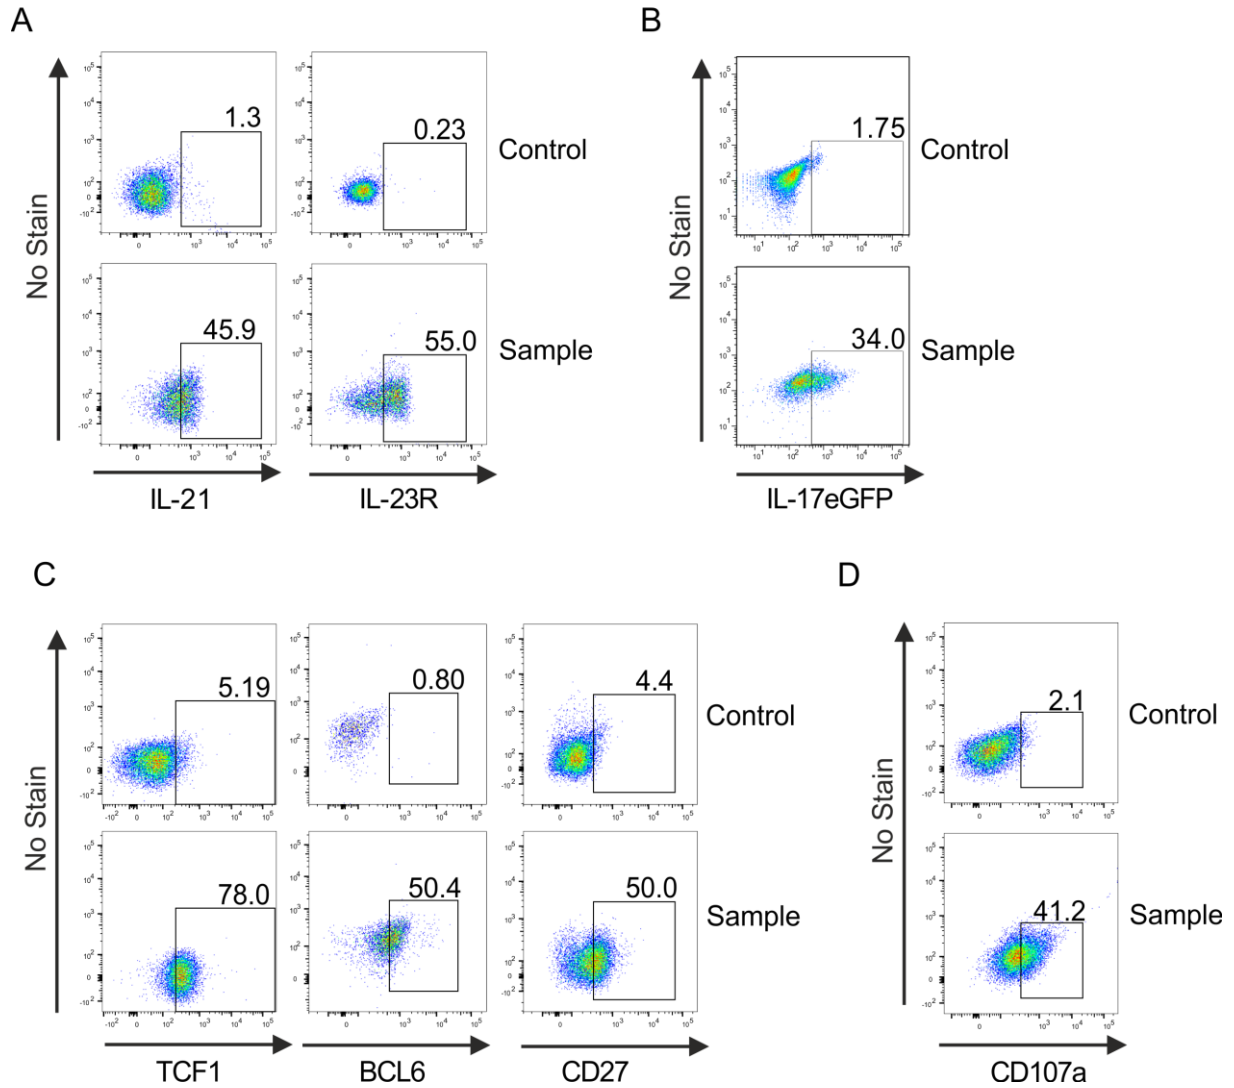

**Figure S1. Gating strategy of flow cytometric dot plots.**

(A,C,D) Unstimulated or unstained CD8<sup>+</sup> T-cells were used as controls to set the gate for IL-21, IL-23R, TCF1, BCL6, CD27 and CD107a staining in CD8<sup>+</sup> T-cells stimulated with microspheres immobilized with anti-CD3, anti-CD28 (Sample). (B) CD8<sup>+</sup> T-cells from C57BL/6 mice stimulated under Tc17 condition with anti-CD3, anti-CD28 were used as a control for IL-17eGFP gating in similarly stimulated CD8<sup>+</sup> T-cells (sample) from IL-17A-eGFP reporter mice.
